# Supplementary material for: Extensive retroviral diversity in shark
Source: PubMed Central journal article supplement (PMC4422223; doi:10.1186/s12977-015-0158-4), 2015-04-28
Supplement: 12977_2015_158_MOESM1_ESM.pdf [file 12977_2015_158_MOESM1_ESM.pdf]

## Dataset 1. Sequences of three complete or nearly complete CmiERVs

>CmiERV\_Scaffold 2

TGTTAGAATTTACACTTTTTGGATAATGTTAGAATCATAATAGATGTTGCGAACGGGTT  
AACGTTTAAGTTAAGTGTGGGGGACAACCTGGACTGACAGTCATGGGATAGGACGCATCT  
GTTTTTCTCTGTTTTTCAAAGAATAACGGACAGGGGCAGGGGGTACCTCTTATCAGTA  
AATGACAACAAGCCACAGAGGTAACGGTCCAAGGTACCGGTCGACATGGGATCCTTGACT  
GAGCAATAAGTCGCTAGATTTCTGACAGGGCCTGCCAACCGACAGAAGGCAACCCTCAAG  
AATAGCAACTAATGAGCAAGTTGTTTAAACAAGAGGACCTTGGTACCATCCCGGGATAC  
TGATAAGGAATAACCAGTCACTTAAAAGGAATGACTAATGATCCCACACCACAAAATA  
ACAAGCATCAGATACAGCTCTAAACTGATCAATCCTCTATCTCAGACAATTAAGACAAT  
GTGTATGTGGGCTGAGGCACGTACACCCACGAGGTGTTACGTGAACCCAGCATGATTT  
TGGCAAGGTGACCTAATGTCCGCACCATGATTAAGACACAGTGCAAGACTAAGATCGAC  
GCGCGCCAGGACAGTACCTACCGTGGATGGAAGACTGAGAGCTAGAAGACAGAAGTAG  
ACGACCACGAGGAGGAATTACGCGGTAGTATTGTTCTGTTAGTAAATTGATTGATTGTG  
CTTACTTGCCCACGCCATCGGGAACCTGGACGGATCCTGGAGTTAATAAACACTACTC  
TGTTTGCAAACAGTGGTTGTGTTTGAATTGGAACCTGAAAAGAAGATTTTATTTTCTAAC  
AATTTGGCGTAGTCGGCAGGATCATTGAGAAAGTGGGACGGAGTAAGTACAATCAAGC  
CTTGACGAAGGTTTATGTTAAGTTTTTGTAGTTACTTATAAATGTTTGTAGTTTTTGT  
TATCCCCTATAGGTGTTGTTAGTCCAACTGAGGGAAGGAAATCCCTTATTACCTCCGG  
GTAAGAAGAGGGACCAGGACTGATAGTAATTGAATGTTGATTTAAATTGTGACTGTGGT  
CGCTGGAATAACCTGTTGGTTGAGACTGAGCTGTGTTAAGTTAATCCAACTGAGGGA  
AGGAAATCCCTTATTACCTCCGGTAAGGAGAGGGACCAGGACTGATAGTAATTGAATG  
CTGATTTCAATTGTGACTGTGGTCTGTTGAAATAACCCGTTGGTTTTGACTGAGCTGTGA  
AATTCGAAAGAAAGCTCATTAAAGAGAGTTAGTACCGTGAGTCGTGGGGTAAATTTCAAC  
TGTTCCGACAGCCAGTGCAAGCTGAGGAAAACCCTCTATTACCTGGGCAAGGAGAGGG  
ACCAGGACCGATAATAATTGGCACTATGGCCCAGGAAATAATTCTGGTTGTGACTGGGC  
TGTGAACTTTGAAAGGAAGCTCATTAAAACAGTTCAGAAGTTGAAGTTGGGGGCAAATG  
ATGAGAATATTCCGCAGCCAAGTGGCGCTACAGGGTATAAGTCTTTAGTAGGAGAAATC  
GAGGAGTTAGGCACTCAGCGGAGGTTGAGTGATAACAAGAAGAAGTTTTTGTGAAATA  
CTGGGCTGTCGTGAGTTGCCAACACCTAGAAGAAGAAAGACACATATGGCAGGAGGAGA  
AAAAATGTGAACAGGAGAGATTAGAGGAGGAGCTAGGAAAAGTGAGAGAACAGGCTGCT  
AAGCATGAAGCAGATCTTCATGCCAGCAGGAGCATGAGAGGGAAAGATTTGAGAAGGA  
TCTGGAAGAAGTGAGAGAACAGGCTGCTAAGCATGAGGCAGATCTTCATGCCAGCAGG  
AGCATGAGAGGGAAAGATTTGAGAAGGATCTGGAAGAAGCGAGAGAGCAGGCAGCAAAG  
TACAAGGCGGACTTCTACGCTCAGCAAGAGCGCGGGGAGTTAGAGCGAAGGGACTTAGA  
AAGTGCGAATAAAGACATAATTGAGAGATATACTACCCTGCAGGGAATTTATAACCATC  
AAGGCGCTATTTTAAATCTAACGTTGTTAAATCTCGAGAGGTCGAGGAGCTTAAGGAA  
GAACGGTTGCGAGATAAGGAAATGATTGCCGGGTTGAGACAGGAAAATGATGATTTGAG  
GGGAGCCCTGCGCTACCAAGAAATAGGTAGGCAGGAGCGAGCGGAGTTAGAAGAGTTAA  
GGAAGAGAAAAGAGGGAGAGAAGGAAGGTAACGAACGGAGACAAGCGTTAGTAGCGGCG  
GTATGTGACATTAAGCCAGTGATAAATGGGGTTTTGTCAGGATGCCGATGATAATAATGT  
AGATTGGGAGAGTTGGATGAAGAGGCAGTGCAGTACAATGAGGATAAAGGGTCAGGGC  
CACCCCTAGTAAAGGGTCGTGTTTGTCCGGTCAGCACTTACAGCGTACCAATGTGAATG  
CTGGGGGCCGGACAAGATTATCAACTCCCTGAGCCCGGAGATGTGGTAGCGTATTGTT  
CTCAGCTGGGGCCCAAATTAACCTCAAGGAACCCATGGCAACCCTGGATAATGAAATGGG

ATACTTGGAAAGAGGATAACGGTGACTTAACTCCCGCCGACTATGCTAGGACACTTAAAG  
GCAATGTTAAGCTCGGATCTCCGAGGGGCTTTAGACCCCTCGTACGATCCCAGGCGGAATT  
GTTACCCCTGCCAATTTACAGGATTTGAGGCAGAGGTGAGGCGAGAGCTGGCTGCCAC  
TCCAACCTCCCTTGAAGATTTGACCTTGTGTAAGCAGGGGGCAAATGAAAGTCCCCTGGCT  
TTTCATCTCAGACTGTGGCAGCTATATTCGGCTAATCAGGAAAATGCCATGAATCGGCAA  
CAATGCGAGAATTCTGTTAATTATAAAAAATGCTGGTTAGGGAAATTGAATAAGAATAC  
CTCTGCTGCTATGGGGTTAGGCATAGATCCCGCCTCCCTTTTTTCATCAACTGATGGGAAC  
AGCCACTAGGTGTCACGGGGCTATTCAGAAAATATTAAGAGTGAAAAGACAGAATCTG  
TGTGGCAGGTGGAGGGGCGAGAGCTGTGGAGACCAGGGAATAATGGTCCGAGCCGAGGG  
CAGCCCCGAAATCAGGGACCCGAGATAGTTCAAGGGATACATGCTATAACCTGTGGTAAA  
CAGGGCCATTGGGCTCCGGACTGTCCAACAGGGCGCAGAGCCCCGCGCACAGAGAGGGCAG  
AGCTTTTCTGCTGACCCCAAACCTGATCAAGAACAGCAAACTATGAGCAATGGGAGAG  
GAACCTGGAGCAGAAGTTAACCCAAGGAATCTTGACTCAGCTAGGCCATAAGCCAGGAC  
GTGGAGGTGGCTCTGTCTCGGCTATAGTCGAGGGGAACCGACCATGCCCTCAATGACATG  
TTTCGGTCCCATAACCCTGATGGCAGCCAAGTGAGCAATTGGTTGTGTGTCCCCTTTGAGA  
AATACGAGGGACCGAGGCCGTTTATATCCATGAAGGTGTGCGGGACCGTCCATGCTATTT  
TGGTAGATTCAGGCTCTACAGCCACCCTGCTTAATTTGAAAACCAACCCCTTCTCCCC  
TCACAGGTGAATGCTTGAATTTTCTGGTGTGTCTGGTAGCCCTATGTGTTGCGTCTTTT  
GCCTGTACAATTGACTTGTAAAGCAACGATTGTTTTAAACAGCCAATTGCTGTAAATT  
TAACCACTGAACCTGGTATCCTCGGGAGCGATGGAACCTAACCTCGCTTAATGCTCTGCTT  
GACTATACTAATCATTGTTTATGGTTAGATCAACATCCTGGTCAGGATCGGTTTTGTGA  
GATATTAGATCGGCATGCTGTGTGCGCTATTATAAAGCCCACCCCATACCCTCCAGTTCA  
GTCAAGTCACCCCTGGATTGGTCCATTATTATCCCAGTTTCCAGGTCTCCGAGCCACTCA  
CAAACACGACTGTGGGAGGAAGATGGCAGTACCTGAAGAGGTTAATGGTCCCACCCACCA  
GCCCTGTAAACAATACCCTTTGCCTAAAGAGAGTTTACCTTATGTCCAGGCCACAATTGA  
GAGTTTAAAGGAACAAGGTGTGATTTGTGAAGGGATATTTACTACTAACTCCCCTATAT  
GGCCCGTTAGGAAACCTGATGGTTCCTGGTGGTTAACCATGATTATCGGCAGCTTAATA  
AAATTACACCTGCTTGTGCCCCAGTTGTAAGTGACATGAGCCAGCTTCTGAAGGACATCC  
CGTCTACTGCTAAATGGTTCTCGATCCTGGATATTTCAAACGGATTCTGGAGCATTCCCTC  
TAAAACCAGAGGACCAGCATAAGTTTGCCTTACGTTCAATGGTCAACAGTACACTTGG  
ACAGTTCTACCTCAAGGTTTCCATAACTCTCCGACCATATTTCACAAACGTATGGTTCAG  
GCACTGCGTAATGTTGTTCCCCCTGATGGTATGAGTATTCTCCAGTTTGTGACGATATT  
TTGCTAATTTCTGATACTCAGGAACTCATCAGACTCTCCTAGAACGGGTATTGAAAGCG  
CTTCTTCAGGCTGGATTGAAACTTAACCCCATGAAGGTACGGTTCAGCTGTCTCTTTTC  
TAGGTGTACAACCTGGATGCAGAGGGACTTCGACCCGATGCTCATAAGGTGACATCATTC  
AGCGCCTCCACCTGCCTGTGACCAAGACTGCACTTCGTTCCCTTCCCTGGACTGGTGGGG  
TACGAAAGGTAATTTCTCCACAATTTGCTGAACTGGCCAAGCCGCTGTACAACCTTGTT  
AAAGGCGATATCCTTGATGATTTCCGTGAACACTGGACAGATGAACATACGGAAGCCGT  
ATCTCAACTTAAACAAGCAATGATGCAGGCTGCTGCTTTGGTGCACCCCGAGCCTGATCA  
GCCTTTTCACTTAGAGGTTGCCGGAGGTCCTACTGCATTAGCAGCCGTTTTGACTCAGCA  
GTTTGAAGGTGGTACCTCCCGATTGCATACATATCTCGCATTCCCACTGGCGTGGAGCA  
ACAGTTTGTGATCCGTGTGAACGTCACCTTTTAGCCGTGTGTTGGGCAGTCACCTCCTTTCA  
ATACATCACTGGACTCCAGAAGATTATTCTTCATTCTCCACACATCCCCGTTCTGCTCCT  
GCAACGACCGGGCAATATGCTTGTCTCCTCACAAAGACTCACTAAATGGGCTCTCACTCT  
GGCTGCTGCTGATTTACCGGTTGTTACTGGTCTGACTACCCTCATTCCCAGATGATGTT  
GTAAGACGGTGACCCGCACACATGCCCTCTCCGTGCTTGAACCTCAGTGATACTGGGAT

CCTTAAGTCCCCGCTGGAGGCTTCCCCGGTGCAGTCTGTGCGCAATGTGTACATTGATGG  
CTCCTCCTTCCATGTTGATGGCAAGGCATTCACTGTTTTTTCCGTTATCCTCCCTGATTG  
TGACATTAGTTTTCCGCTGCATACCACATTCTGCTCAATATGCTGAGTTGGCCGACTCGT  
TGAAGCGGTACGCCAGACTGCCAAAGTGGCTACCAACATATGGTCCGACAGCGCTTATGT  
TGTAATACTGTGTTACTATTACCTTTGACTCTTCCCAGAAATTTTTGTACCTTTGCAGG  
AACGACGTTGGTTCACGCGTCACTTCTGAGATGTCTGGCTGATGAGATATCCTGTGCGAC  
CCATCCGCTGTATGTTGGTAAGGTGGCAGGTCATCAAAGACTGGACCGCACTCACACAG  
GAACAATCATGCTGATGTCGTTGCTCACCATTCCGCTCTTAATGGAGAAGCATGGATTTT  
TTCCCCTCTCCGCTGCCTCAGTGAGGAGCATCTCAACTTCGCCCTCTTTGACTGATTTG  
ATTAAACTCCAGAATTCATACCCGCCTTACATCGAAGCCGTGCAGTGGCACCAGGAGCAA  
CTTGCTGGACTTGATATCCATCCCGATCCACAATATGATTGGCTAGTGCACACCCATTTG  
TACGTTCTCTGGACTCTCTGGCCTCCCCTGTTCTCATTCTCATGTATTCTAAGCACGAT  
ATCTCCACTGTGTGATTCCCACAGATTGTGCTGATGCGATCTTTCGGTTATAACCACTCA  
CATCCTACTGGTGGTCACTTTCGTCCCTCAAAAACCATCACTAAGTTGTTGCGCTCCGTC  
TGGTGGCCTGGTTTGTCTCATGACGTTTCATGAACGATGTAAGACGTGCCTTGTGTGCTTC  
CAGCATAATCCCCCTCGATCTACTAATCGAGCGTTATTGCAGAGTGCACCCTATCCCTCA  
GGTCCTTGACCAATATTCAGATTGATTTTATTGGGCCATCGTTCACAGCTGCCGGTGGT  
TACAAATACTGTTTAGTCATTATTGATAAGTTTACAAAATGGATTGAAGCTTTCCTGAC  
TAAAAATAACACAGCGCTCACTGCTGCACGCATTTTATTGCGTGAGGTGATCTGCAGGTG  
GGGAATCCCTGGTATATTGGATAGTGATCAGGGATCACATTTACGGGCAAAGTTTTTA  
CTAAATTGATGGAATTGCTGGAAATTGATCACAAATTGCATGTGTCATACCATCCTCAA  
TCCTCAGGGGTAGTAGAAAGAAGTAACCGCACATTAAGGTTTGGTTGTCAAATTTTG  
TGCAGATCACCCACGCAATGGATGAAGGGATTGCCACTGTGTCTAATGGCAATTCGCTC  
CATCCCACATGCTACTACTGGCATTTCACCCTATCAAGCGATGACAGGTCATTTAATGAG  
GCTACCAGGTTGTACAGTAGTGATGACTGAACAAGCCCTCGAACAATTAGAGGGTAATG  
TTAAATTGCAGGGAAGTGCAGGAGGAGACATGGGTGAAAGAGATGCTAAAGATCATAACAG  
GAAACCAGCAGGTTTGTGGCTTCAAACACTGGTAAGGCCGAAACAAAGTATGAAGCAACA  
ATTTGACACTACCGTTAACCATGTGGAGTATGAAATTGGAGATGAAGTCATGGTCCGCG  
TGTATGGGAAAAAGGAATCTCCTTTTCCCCCGGATGGAAAGGGCCTTTTGAAATTTTG  
GAAAAGGCAAGCCCGGCAGTATATTTAATTGCCACGCCCTTTGTCTTCTAAATTGACTAAA  
TGGTACCATGTGAATCAACTCAAACTGTAAGAAGGGAAAAGGATAAACTGATGACTG  
AATATATGCTACATTTGTATTTTGCAGGCACCAACCGAGTGATTACCGGATCTTCTGTAT  
CAATATGGATCTGGATGGAATTACTGGAGGACTGGTGCTTGGCTTTGTAATACTACTAA  
TCCAGAACTCCCACGTTTACTCCCATGATAACCCCTTTGATGGAAACCCCCATAACTTT  
TCTTATTAGCAGCTTATAGATATGCAAAAAATAACCAGGTGTCTAGTTGTTATGTATGC  
GCTAATATGCCAACATCTGTAAACATGGAATACCAGTAAGGGCCATTCCTGGCAATGTT  
AGCTTAACTGCATTTTGGTATTTCAACCAAAATCAGACGAATGTTAACCACGCCGCTGCA  
TGCGACTGGTCAATTCCTATTGGGGACGATCGAAGACGATGGGAATCAGCAGGGTATAG  
TTTCAAGGAATACCGTGGGTATTACCAACCACCATATGATGTTACCCTCTACCCCCGAC  
ATTAAGTGTTCCCAACTCCCCTTCAGGTGAGATCTGCATCTCCCGCAATATAACTGGGGG  
ATTTCCCTGTAGGAGAGAGCAAATGTGCCCAGACATTTGTGATAGGTAACGATAACGTGTT  
CCCACCCACGGCATTGGCCATATAACCATCCTCAGTTTCAAAAATCTCACCACAGGTA  
CCTTTAACCAAGTTTGGATTCCCCTGAGGTTGGGACCCAACATTA  
CTTATTTTGTATGCGGAAACAAGGCCTATCCATGGCTGCCGCTTAATTGGACAGGGAAAT  
GCTATCTTGCTTATGTTGTCCCAGGTCTAAGACATGCCTATAAGTTACTAAATGACCACC  
ATATTAACAAAAGATCCATCACTAAGGCCGAACCATTTCTTGTCTATTGCTTTTCCCATGT

ATAGAACTTCTAAGTTTTCCCAAGAAAGCATTAGTATGGCTAAAATCCTTGAGCAGGTG  
GCAAATGATACCGCAGAAGCTGTTGACTCTTTGACCGCTGAAGTAGTTGCTATTCGGACA  
GTGGCTTTGCAAAATCGCATGGCATTAGATTTTCGTATTGGCTAAAGAAGGAGGTGCATG  
CGCCATAATTGGGTCTGAGTGTGTACATATATCCGGATAACTCCGAGAATATAAGTA  
GATTGACTGATCATATCCGGAAAGAGATGGATAAATTGAAGCAGGCCCATCTTCATCTC  
TTTGGGCATGGACCACTTCTTGGTTGGGTTCTATTGGAAGTTCACTGTTACATGGGCTAA  
TTATTATTGTTGTGATCTTGCTTTGCGTTTATTGCGCTGTTACGGGTGTGAAGTTTATTT  
TTCTTAAAGTTATGTCTAGTGTGGTTTCTTCTGAGGTACCCTTTGTAGGGAATGATGGA  
GAGGCTGGCAAAGTTGCTGCCATCCACCCTGTTGACTGGAAGTACCATCCTCCCTCCAG  
GTTGTGTGACCTTGTACTATTATTCTGACTTTGTATTATTTGTCTTTTTGTATTATCAGG  
TTGTGTAACCTTATTATTTTCTGATTTTATATTATATTCTTTTTGTAGTTTTGTGATAC  
CTCATGTTCAATTCGGTATCAAGGTGAGGACTGTTAGAATTTACACTTTTTGGATAATGT  
TAGAATCATAATAGATGTTGCGAACAGGTTAACTTTTAAGTTAAGTGTGGGGGGCAACT  
GGACTGACAGTCATGGGATAGGACTCATCTGTTTTCTCTGTTTTTCAAAGAATAACGG  
ACAGGGTCAGGGGGTACCTCTTATCAGTAAATGACAACAAGCCACAGAGGTAACGGTCC  
AAGGTACCGGTCGACACGGGATCTTGACTGAGCAATAAGTCGCTAGATTTCTGACAGGGC  
CGCCAAGCGACAGAAGGCAACCCTCAAGAATAGCAACTAATGAGCAAGTTGTTTAAAC  
AAGAGGACCTTGGTACCATCCCGTGATACTGATAAAGAATAACCAGTCACTTAAAGGA  
ATGTACTAATGATCCCACACCACAAAATAATGAGCACCAGATACAGCCCTAAACTGATCA  
ATCCTCTATCTTAGACAATTAAGACAATGTGTATGTGGGCTGAGGCACGTACACCCCAT  
GAGGTATTCAGTGAACCCAGCATGATTTTGGCCAGGTGACCTAATGTCCGCATCATGAT  
TAAGACACAGTGCCAGACCAAGATCGACGCGCGCCAGGACAGCACCTACCGTGGATGGA  
AGACTGAGAGCTAGAAGACAGAAGTAGATGACCACAAGGAGGAATTACGCGGTAGTATT  
GTTCTGTTAGTAAATTTGATTGATTGTGCTTACTTGCCACGCCCATCGGGAAGTTGGACG  
GATCCTGGAGTTTAAATAAACACTACTCTGGTTGCAAACAGTGGTTGTGTTTATTGGAA  
CTCGAAAAGGAGATTTTATCTTCTAACA

>CmiERV\_Scaffold 324

TGTGGAAGGTGAATTCAGCACATTCTGCAGAGTTAGCAAAATGAACAGGACGTGAGGAC  
CTAAGACCAAAGGGCAAAGGCCAGGGGGGCCACTGGCCTTAAGTCAAATATATGCTG  
TCATGAAGTTGTCACGAATGCTCGTGATTGGCATTGTTTAAAGATAGATAAGCAGGTGT  
CTAGTATCGGTACCGCATCCTGAAGTCATGTCTAGAATCAGTTCTGGGGTCAGATAACAT  
TCAGCAGCATCAGCATTGTTCATTCTTTAAATGTCTTTTCTATATGTACTTAATTGT  
AAGGACAGAGTGATTGTCTTTGCAAAAACAGACATCCGGTCACAAGGAAGACTATATCG  
AAATGTAACAAATTTAGAGGGTCCCCTCATGATTATTGATTGACTCATAGTTCCATAAG  
ATTTTGTATAAAGGTGAGGTGCTTGCTCCCATTTAGTGTGTAGTGTGGGAGCAGCACA  
CGAGCAGTTGTTGCCACGATACTACACCCACATGTGTGAAAATAAAGCTTGTTAATTGA  
ACGCCGCACTGACTCCGTTGTTGTGCTTCAGGTCATCAAGAGCAATCACATATCGTAATT  
GGGTTTCGACAATTTGGAGGTTCCACCGAGATCGAAAGACTGGGTTTTCCCTTCGGCTTCC  
TACATCTCTGCAGCTATCAGCACAAACATCGCGCACAGGTAAGCATTCTTACCATTGTTT  
GTGCCTGATGTGTTGATGAGACGTGGTTGCCGAAGAACTCCCGGCCTCTTCGATTTAAGG  
TGCAAAATTTGCGATTTGTTAGACCTAAATAATTTTCAGGCGGCTTAGTACTGTAAGGTA  
TAGACGTCTTGGGTATAAAGAATTGGCCAGAGATACTATAAAGAATAGTATATAGACGT  
CTTGAGTATAAGGAATTGGCCAGAGATACTATAAAGAATAGTATATATACGTCTTAAGT  
AAGATAAAGTCTTGCATGCATAAGGAATCGGCCGTTGAAAATAGAAATAGATAATTGAT  
TGTTCTTATTTTTTATTGATTGTGTTGGGGCAGCCACTCACTTTGTTCTTGAATTACCATGGG



GAACCACTCCTTGAATGTTATTTTTAGAGCATGGTTTGACAGCACCCACTTCCACATTGC  
ATTGCACGGCTTTTTATGTTGAGAATATGGAGGTGGACATAACTCGGTTCAAGGAACAC  
GTAGCGGTTGTTTCCACTATTCAGGCTCACTTTTTCTATCTGGGACCACAGGGTGTGCA  
GCTGCATGTACTCTGACAACGGAGGAGCAGCTTTATTTAAAGGTAATAATCCGACCCT  
CATGTAACATTAAGAGTAGCAGACGGGTTTAGCCCAAGGGACTTAGGGCACATGGTCAG  
GAAGGCAAACCTGGTCGTCAGATTTCACTGAACTTTGCCCTCTAGTTTGCCCTGGCATT  
ATACGACCCAGCTTTACGGATTTATAAGTTGTGTCTAGGTCCCCTCCCCTTTTTACTAT  
GTTTCGAGTTTATCCAACACACTCACACTATATCTTCCCATGTTCTGCCTCTTCGGCCGGC  
AGATCCAGAGTGGTTGGAAGATATAGACTCCGTCCTATGGACAACACACCCCAATGATGT  
AGGAAAATACTGACGGCAGCACCCCTCAAGGTACAGGTGTACCCGAAAAACCCCTTCC  
CTACCGCGGCAGTATCCATTAATAAAGGAAGCAGAGGAGGGAATACGAGCAGTAATAG  
AGAGCTTGTGAATCAGGAAATCATTATTAATACCGTAGCCCCTGTAACACTCCCATTC  
TACCAGTCTTAAGCAGATGGAAAGAGATGGCGCTTTGTCCAGGATTTAAGAGCGGTT  
AATGATGTAGTAATACAATGTTGTCTGTAGTTCCTAATCCGGCGACTATTCTGACAGCC  
ATTCCCCTGTTTCGGTTTGTATTTCAGTTGTTGATTTATGTTCCGCATTCTTTTCAATC  
CCAATTCACCCTGAGTCTACTACTTGTTCCTTTACATACAAGGGTGAACAATATACG  
TGGACCAGGTTACCCCAAGGATACTGTGAGAGTCCCCTATCTTTTCTCAGACTTTGCGG  
CATGACTTGCAGGATTTGCGCTTTCCAGGGAAAAGTACCCTAATCCAGTATGTAGATGAT  
TTATTAATTGCGAGCCCATCCGTGGAGGATTGTGAGAAAGATACCAAATACCTCTTGCA  
GCAATTGGCGGTAAAAGGCCATAAAGTGGCGAGAGATAAATTACAGTTTGTAAGGCCAC  
AGGTCCGTATTTAGGACACGATTTGTGTCAAGACACTCGTCAACTTCCCTTGATAGGA  
TAGAGAGTATTAGGAAAATTCCAAACCATCCACAATCAGGCAAATGAAACACTTTTTA  
GGGATGGCCAATTATTGCAGGCAGTGGATTAGCAATTACGCTCAACTGTCTAAACCCCTG  
ACTGAAATGACCAAACCGACCTCCAGCCTAGAACCCTTAGTGTGGAAGGCGGACCAAAC  
TTTGATCAGCTCAAACCGGCTTTACAGAGCGCCCCGCTTTAGGCATTCCCAATTATGAC  
AAGATATTTAACTTATTTGTGCATGAAATCAAAGGATTCGCGCAAGCAGTCTCACTCA  
GGAACATGGGGGAGGCCAGCGCCCGTTCATACTTCACTTCCCTAGTTGGATCCGGTAGC  
CAGTGTCTTCCAGGATGCCTGAAGGCTGTTGCTGCCACATACTATGCAGTTATGCAGGC  
TGAAGGGTTGACGTTAAATCACCCCTTATCGTGCATGTCCCGCACTCGGTCGAGGCATG  
TCTATTTGACATGCTACTCAACATTTAACAAGTGCCAGGAGCAGCAAGTATGAGGTGG  
GTCTACTATCCAAACCAAATTTAACTATTAACGTTGCACTGTTCTAAACCCAGCAACCC  
TTGTGCCATAGAAGAGGAAGGGGAACCCCATGATTGCCTTAAAGTCATTATATTAGAG  
ACAAAACCTCGCTTAGATTTGAAGGAGAATCCCTTGCAAATGCAGACTTTGAATGGTT  
TGTAGATGGATCAGCTTGTAGGAACGAGTTCGGTCAACCCTGTGCAGGGTATGCTATTG  
TATCAGCTACCACTATTATTGAAAGCGACTCGTTACCCTCCACCACATCTGCGCAGGCTG  
CAGAGCTAACTGCTCTGAAGCGAGCATGTGAATTGGCTGAAGGGCAAACGCTCAATGTG  
TTCACTGACTCCCGCTATGCATTCGGAGTATGTCATGATTTCCGGTCAATTGTGGAAAAC  
CGGGGGTTTCTTACTTCAAGTGTGTCCCCATTAAACACAAAGACCTTATAGTAGGTCTT  
CTCACCGCATTACTACGGCCAAAAGCCATTGCGGTCATAAAATGCGCGGCCCATACTAAC  
CAAACCTGACCCAGTCTCTAAGGGAAATGCTCACGCAGATGCTGCTGCTAAAAATGCTGCT  
TTAAGTAAGCCTGTAAAGTTACTAACATTACAACCGACTATCAAGCACCCCGCTGCTACT  
GATACAATGCGTGGTGAGATATTTCCGGATCCAATATGAGGCCCTCTGGAGGAGAAGCA  
ACAGTGGACCCGCCTACATTGTTTCATTAACGACCTAGGGATTTGGGTCTCGAATGAATT  
AAAGGTAGTCTGCCCCGACAAATGTTCCCATGGATGGCACATGTGTTGCATAATTTTAC  
CCATGAAGGGACCCAGTCCATGTATAATTGGATAACGAAGTCGTGGTTTGGCCAGGATT  
AACCCCTTTTCTCCAGCAGGTTGTGAAATGTTGTGTAATATGTCAAAGGTTTAAACCCAGG

CAAGGTTGACGATGTGACTCCGGCGTCCCATCCTCCCCCTCAGGGTCCCTTTGCGCACCTT  
CAAATGGATTTTATTAGTTACCAAAGCCGAAGGATATCAGTATGTGTTGGTTATTGT  
GGATATGTTTTCTAAATGGATTGAAGCTTTTCCTTGTAGGAGGAATGATGCCACGACAA  
CGGCCAAAATATTGTTAAGAGACATCCTTTCTCGGTTTCGGCATAACCATCTCGCCTTTCT  
CCGATAATGGTCCCTCACTTTATTGCCACGGTAATAAAGGACATTTGCAAAAATGTTGCAA  
ATAAACACAGCATCTGCATTGTGCATATCATCCCCAATCTGCAGGGGCTGTTGAAAGGGCT  
AATGGGACGCTAAAGTTGAAATTGTCCAACTGTCTGAACAGACAAAATTAATTTGGGT  
AACAGTCTTGCCATTAGCCTTGATGCAAATGAGGAACCATACGAATGCAAAAAGCAAGC  
TGTCTCCTCACGAGATCATTTTCGGAAGGAGCATGCCCATGGTTTACTCCGCACACATTG  
AACCGTTGCCTGACGTGCATGCCCTCGAGGAAGGGATGATGCAATACTGCATTGCGTTGA  
CTAACACCCTATTTAGTTTAAATTCACAGGTTTCGAGTGCTCCAACATCCACCGGCATCTG  
ATCAATGCCACAAGTTTCAGCCAGGCGATTCTGTTTACATCAAGACCTTCAAACGAAAGA  
ACGGACTGAGCCCGCGCTGGGAAGGACCGTTCCAAGTTCTATTGGTGACCCACACTGCTG  
TGAAGGTTTCGAGAAAGGTCTACGTGGATTTCATGCTAGTCACTGCAAGCAAGCCCCAGCGG  
ACTCCGGCGATTGCGAAAAAGCCTAACGTTGTTACTTTTTTCATTTTTTTTGACGGACTTT  
GCTTCATTATGGGGTTGTTGTTTTGTATGTTTTTATTGTTTTTGCTATGTTGCCATACTT  
ACTCTCTTGTCAGGGGGAGGTGTTTACTGATTTTTGATCTCCTTAAACCGTGATCTCA  
CCGTATCTGATGATCAGTCGGAAGCCTGTTCTTCCGCCATTTGTTACACTGATATACCCC  
TTGAGAAACGATCCTACTTGTTAATGTTCATTTTTTGTTGTGGAATGCTCAGGATAGA  
TCATACGCAGACGATTTGAGCTGTCCTAAGGATTCGGTCAATGTCAATCCGTCCATAAC  
AACTCCATGATTATGTGTTATTGTTCCATTTATTATCACTGTTCTTTTACCGAGTCTTGC  
TTGTACTCTACTGAACGCGCCCGGTTTTCCAACGAAACCCAGCTCGTGTTTTTGCCTCCT  
GGTACCTATAGGGCTAGAATTTATACAGGGGTGTCTCAGGACTGGCAGGAGGGTTTAGT  
TGAGCCTCACTTGCCTTCCCTCGTCACTGGTCTCACTTCCTCGTGACGTTCCATTTGTTGAC  
ATGTATCCCTTTAAAACCTGCGCACCAACATTTGTTTGGTGACTTTTTACCAGCAGATTCT  
CCCCAGCCTTTCCAATTGCGGAATGTTTATATTCAAATGCTCCAGACTGTGAGCTTGCAC  
AGAAATAAATCCCAGCATCATGTATGTGGATTGTCCCACCGTCAGTCCAGATGGGGTAC  
CCTATGATGGCTTTCCCATTTGTCTACCTGTGAGCTTTGTTCCCTTTTTCATTTGCAAGTT  
AGGCAAACCTCACCTTGTCCCTGTTACACCAAGAATTACACGAATTGCAGTGTGCTCGT  
CAATCCTGGAAGCCACGAATGTGTAATCGTGACTGCGGCAAGCCCCCTAAGATTGGCACT  
GCCACTATGGTCTATGCGGGTTTTTCGTTTTGCGTTCGAGTCCTTTTCCGGGACTGAACCA  
CTGGGGTTTTCTGGATTCCCACCTTTGCAACACCACATATCCTTATGCTGCGGTGGCTGTT  
TTCCCTTCTAATTTTCGGGGATTGCCAGGTCACCTTATCATCACATATTCACAGGATGATA  
ACATACTCCGTTAATCAGCGCTGTGCCATTTCCCCGATTCATAAGGATTTTTATTGGGTT  
TCCAATTCTACTGTCTATGCTTACTTACCAGCAAATTTCAAAGGGAGATGCGCTCTCTTT  
CATTATTTTCTATGATTCGTCTAACCAATACCCTGCCTTCTGCCCGGGCCCCACTAGTCC  
TAAATACCTCCAGCCTACTCCCTCCCCGCCAGGTTTCATCACTCTCGCAGAGCCGACCCTTT  
TCACACCCATTCCCAGATCCTGTGGAATCGCATGCTCGGGGCTCTTCTCCCTAATTATGG  
AGTAATGTGCGCCCTTGACCAGATTGCCATTCTCTCTCAGGCGGTCTCCACATTGGCCTC  
TGATACATCTGCGGCATTGGCTCTCGTTAACAAAGAGATGTCTGAGATTCGTCTATAGGC  
TATGCAGAACCGTATGGCCCTCGATTATGTTTTAGCTGTGACGGGAGGAGTGTGTAAGG  
TCATTGGACCTGAATGCTGCATAACAATTGATGATTTTTCTGGTTCTATCTCAAACATTA  
CCAAAGAGATCAATCAAACAGGGCATGATGCGAGTAATATCATCATACTTCTGGAGGA  
GGATTACTGGATTGGTTGGGTAATTGGTTGCAAGGATGGGGCTAGGATGGTTGGGCAG  
TGCTGTCCAGGTTCTATTGGAAATAGGCCTAATCCTTGTTTTTATTGTTCTCATCTAA  
ATGTGCCCTCATTTGTTGCACACAATGTTGCAAAAAGACTACACGCACCATGATGACCAT

GAACATGGTCCACGTTAACCAACACCTTAGCCCATTTTCCCCACGTGATAAATGTGACCT  
CGAGATGCCCTATGCCTTTCCGGATTCCCTCTCGGAAAGCAGTACACTCGAGGGCTAGAA  
AGCACGGAAGGGTTATCCCAGGGATAAAAGGGAGGAGTGTGGAAGGTGAATTCCGCACA  
TTCTGCAGAGTTAGCAAAATGAACAGGACGTGAGGACCTAAGACCAAAGGGCAAAGG  
CCAGGGGGCCCCCTGGCCTTAAGTGAAATATATATGTTGTTATGAAGTTGTCACGAATGC  
TCGTGATTGGCATTGTTTAAAGATAGATAAGCAAATGTCTAGTATCGGTACCGCTCCTG  
AAGTCATGTCTGGAATCAGTTCTGGGGTCAGATAACATTCAGCAGCATCAGCATTGTGCA  
TTCTTTAAAATGTCCTTTTCCTATATGTACTTAATTGTAAGGACAGAGTAATTGTCTTTG  
TAAAACAGACATCCGGTACAAGGAAGACTATGTCGAAATGTAACCAATTTAGAGGGTC  
CCCTCATGATTATTGATTGACTCATAGTTCGATAAGATTTTGTATAAAGGTGAGGTGCT  
TGCTCCCATTTAGTGTGTAGTGTGGGAGCAGCACACGAGCAGTTGTTGCCACGATACTA  
CACCCACATGTGTGAAAATAAACTTGTAAATTGAACGCCGCACTGACTCCGTTGTTGT  
GCTTCAGGTCATCAAGAGCAATCGCATATCGTAATTGGGTTTCGACA

>CmiERV\_scaffold 2324

GAGGAGAGAGAGGAGACTGAACGTATATTAGCGTTAATACAGTCTCCTGGGAGTGCTTG  
GTTGACATTAAGAGTGAATGGAATTGACATACCGTTTTTATGCGATTCAGGAGCATGTA  
GAACGGTTATTACGATGAGAGACGCAACTTTTCCTTATAAAAAGAGTCTGGAAAAAATT  
GATATTCGATCAGCGTCCGGAGACTTAGAAACACAATGCGTCACGGAACCTCTTGAATTC  
TGTTACAAGAATAAAGAGACTGTAGAAGCACAAGTGGTTATATCAATGACATGCCCGGT  
TAATCTACTAGGGAGAGATGTGTTAACTAACTCAAGTTAGGAGTGATACCTATGGGTG  
ACGACCGATGGGAAGCAGTTAAGGTTACGTAAAAAAAAGATTGAAGAAACCCTAATTA  
TCCAAGAAAGGGGGGAACCACAATACTATTATGCCCTACAGTTAAAGGAAGGGCCAGGA  
CAATTCCAACAGGAACTGCTTAGATTGGCACACCAGCGGGTCATGGAACAAAGTGACTTC  
CACCTGCCTGAGGATCTGCACTGTACCATGTGGTACCGTGAAAAACGGGGAAGTTCGTTG  
CCATATGAGAGACATTTCAAATTGGGAAGTTCACACGATTAACGATTCAATGTATATA  
TTGGAATGCAACTGATATGGGAGGGAAAGTTTTACTCCAACCGTTAGATGATCAGCTAT  
ACCAGGGAGAAGGGAACCCCATGTATCAATTGCAAAGAGATGCAAAAAGTCATGGCAA  
CAAGTGGGTAACCTGGTAGATTGTGGGATAAAAGCACAGGATTGGGAAGAGACTCAGGA  
TGCAGGAATATGGTATTCCCCGAGGACAGGTCTCTACTCACAATGTTTGAATTGGGTGTA  
TCAATGTGAAAGAGTTAGGAAGATGCACTCAGGGAAGATGGTTCCTGACTGTTAGGAG  
TGGAATAGAACAGGAGGCGGAGTTGAATGCTCTGCCTGATGCTCTATGGTCAAAGGA  
TCAGCTGACGTAGGACTAATAAAAGGGATTGAACCTATTAATAATCATACCGAAAGGAAC  
ACACCGCCGTACCAACGGCAGTATCCTATGAAACCAGAGGCCATTGAAGGAATTGAACC  
CATAATTATGGAACTTAAGGAGAAGGGCATCATAGTGGATTGCCCTGACTCTCCATGTA  
ACAGCCCCCTGGTCCAGTAAAAAAGGTAGCGCCATCACAAGGGTGGCGATTGGTTCAGG  
ATTTACAGGCTGTAAATAAGGCAGTGATTCCCCGGACCCAGTTGTACCCGACCCCAATA  
CCTTGCTGAACAATTTGCGACCTGATACAGCTTGGTTTACAGTAATTGATTGAGCAAATG  
CGTTTTTTTCTATTCCGGTTGACAAGGCCTCCCAATTTTGGTTTGCCTTACATTTTTGG  
GAAGGAAATATATGTACACCAGATGTCCACAGGGATTTGTTGAATCCCCGGCCATATTCT  
CACAATGTATGGAAAGTAATCTGGCAAAATTTGAGCCCCGGGTGGCAGTCAAGTTTTG  
TTGTATGTAGATGACATACTCATATGTTCCCGTCTAACGAAATTTGCCGCCAAGATTCT  
CTGGCTTGCTTAAGATTCTTGGGAAGAATGGGGCCATAAAGTAAGCCAAAATAAACTACA  
ATATTGTCTACCCGAGGTCAAATATCTGGGCCATACAATTTCTAGGGAAGGGAAATCCTT  
ATTGAAAGACAGAAAGCTTGCAGATAATGCAAGCTCCGCGGCCGAACTAAACAACAGA  
TGATGTCATTTTTGTGGATGACTAATTTCTGCCGCGCTTGATCTCTTCATATGCGGAGC



TGACTCAGCCCTTGTTAGGGTTGATTTATGATACCCCTATGAAGGCACAGGATGCAATTG  
AGTGGAACCCAGAGGCTATAAGGGCATTGAAATTATAAAAACGATTTTATCCAGGGCA  
GAACTTTGGCACATCCTGACCCTGTAAAGCCATACACTCAAAGTCTGCGTTAAAAAT  
GAGTTTATGGTATCTGTCCTCTTACAACCATTTGGAACGCGAATGCGACCCGTGGCTTAT  
TACTCACACTGACTGGATCCAGTGGCTCGAGGCCTTCCTTGCTGCTTACAAGCAGTAGAA  
GCAGCAGCTCTGGCTGTTGCGCATCATTGCCCTGGTCTGTACCAACCATTGAAGTTG  
TTGGTTCCACATGCAGTTTCGGTATTATTGCTTCAAACATAACATGCCTTCCTATCGCCA  
GCACGCCAGCTATCCTGTATGGCCACATTGCTGACCTGCCCAAATTTAACATTGAACGA  
TGCACGGTGTGAATCCGGCAACCTTGCTGCCAGTACCTCCGAGGGTAGCCCTCACGAC  
TGTTTGGAAAAGACCTCACAGTCAGTAGCGGTGCGAGTAGATTTGGCGGACACAAGGTT  
TGAGAATGCAGATGTGACATACTTTGTGGACGGTTCATGCAAAAAGGACATGGTGGGCC  
GTTCCCAAAGTATGTATGCTGTATGACTCAGGACACGGTAGTAGAAGCAGCCAGACTCC  
CAACAGGATATTCGGCACAAATGGCTGAACTTGTTGGCGCTTACTCGAGCTTGTGTACTGG  
GGAAGAGAAAAATTAATAACATCTATACAGACTCACAATATGCCATTCTAATTGCCAC  
ATATTTGCCGACAGTGGCGAAACCGGGTATGGTTACCTCCACAGGTAAACCAATTTCC  
CATGCTGATTTAATATTGAACCTAATTGATGCATTTCAACTCCCAAAAACAATTAGCAAT  
ACTTAAGTGTGTTGCCACACCTCTGCGAAAGACCTGGTGTCAAGGGGAAATGCCTTTGC  
AGATAAAACTGCCAGGCAGTCCCCTCGCAGAAGTATTAGTGTCAAAACACCACCCTC  
GATCGACATGACATTCATTAACCGGTGCAATCAGAGGCAGGCACCCTTGAGAAGCGAG  
GATGGAAAAACATGGGATGCAAACATAACACATTCGGCATATGGGTGGAAACACTGGA  
CTGCCAGTCTTACCACGATCATTGTTTCCATTGCAGCAGGATTGAGCCACGGCAAATGC  
CATGTCTCAAAGGAGGGATGAGGACAACGATAGACCAACAATATACAACATTCGGACT  
AACCACTTATTTACAAAATTTTGTCAACAATGTATAACATGTTTACGCAATAACCCACA  
AGGACAATAAAATGTAAACAAGGGAAGATTCTATTGGCAAAGGAACCTTCTCTCATT  
GGATGATGGATTTTCATCCATCTAAACGTATGCGAAGGAAAAAATATTGCCTAGTAATG  
GTATGTCTTTCTCGGGTTGGGTAGAAGCTTTCCCAACAACCCATGTGGATGCAGTAAGA  
GTAGCAAAGATATTATGCAGAGAAATAATACCAAGATGGGGTATCCCGCGAATATTATA  
TAGTGATAATGGGCCGGAATTTAAGAATGAGGTCTGAGAAATGTGGGGATTCACTTGG  
GGATAACCTTAAAGAACAACACTGTGCCTACCATCCAGAGTCTGCAGGAATGGTAGAAAGA  
CATAATGGGACACTTAAAAATAAGTTGAAGAAAGCCATGGAAACCACAGGAAAGGGTTG  
GGTGGCATGTCTACCATTAGCACTGACAAGTATGAGAATTACACCTGGGAGCAAGAAAC  
TCCCGTATGAAATTGTTATGGGTAGAGCATATTACATGCTTGGAGAACGTACAGAATT  
GGAGGAGGCCGACTTGCAGGATATATGAAAAAATGTTTCAGAACAAAATGCCTATGA  
GAAACGTATTACCTCCCAGGAACTGAATGAGAACACCGAGCCATGCCACTGCAGCCAG  
GAGATTGGACACTGATTAAGACATCAAAGGAAGCATTGGCATCAACCAAAGTGGACA  
GGACCATATCAGGTGCTACTAACCACACCAACAGCAGTACGGATTGCAGAACGAAACACC  
TGGGTCCACGTTAGCCACTGC
