# Supplementary material for: Extensive retroviral diversity in shark
Source: PubMed Central journal article supplement (PMC4422223; doi:10.1186/s12977-015-0158-4), 2015-04-28
Supplement: 12977_2015_158_MOESM2_ESM.pdf [file 12977_2015_158_MOESM2_ESM.pdf]

**Table S1. The representative retrovirus sequences used for phylogenetic reconstruction**

| Name                                                    | Accession No./Source |
|---------------------------------------------------------|----------------------|
| Bovine foamy virus (BFV)                                | NC_001831.1          |
| Equine foamy virus (EFV)                                | NC_002201.1          |
| Feline foamy virus (FFV)                                | NC_001871.1          |
| SFVspm                                                  | EU010385.1           |
| SFVgor                                                  | HM245790.1           |
| SFVcpz                                                  | NC_001364.1          |
| SFVmac                                                  | NC_010819.1          |
| SFVagm                                                  | NC_010820.1          |
| Bovine leukemia virus (BLV)                             | NP_056895.1          |
| Human T-cell leukemia virus type 1 (HTLV-1)             | NP_057860.1          |
| Human T-cell leukemia virus type 2 (HTLV-2)             | NP_041003.2          |
| Bovine immunodeficiency virus (BIV)                     | NP_040563.1          |
| Human immunodeficiency virus type 2 (HIV-2)             | NP_663784.1          |
| Human immunodeficiency virus type 1 (HIV-1)             | ABK51636.1           |
| SIVcol                                                  | AAK01033.1           |
| SIVcpz                                                  | ABU53017.1           |
| Jembrana disease virus (JDV)                            | AAA64389.1           |
| Caprine arthritis-encephalitis virus (CAEV)             | NP_040939.1          |
| Maedi-visna virus (MVV)                                 | YP_536867.1          |
| Equine infectious anemia virus (EIAV)                   | NP_056902.1          |
| Feline immunodeficiency virus (FIV)                     | NP_040973.1          |
| Lymphoproliferative disease virus (LDV)                 | AAA62195.1           |
| Avian leukosis virus (ALV)                              | YP_004222728.1       |
| Murine endogenous retrovirus type L (MERV-L)            | CAA73251.1           |
| Python molurus endogenous retrovirus (Python-molurus)   | AAN77283.1           |
| Mouse mammary tumor virus (MMTV)                        | NP_056880.1          |
| Jaagsiekte sheep retrovirus (JSRV)                      | NP_041186.1          |
| Simian retrovirus 2 (SRV-2)                             | AAA47562.1           |
| Simian retrovirus 1 (SRV-1)                             | AAA47732.1           |
| Snakehead retrovirus (SnRV)                             | NP_043924.1          |
| Walleye epidermal hyperplasia virus type 1 (WEHV-1)     | AF133051             |
| Walleye epidermal hyperplasia virus type 2 (WEHV-2)     | AF133052             |
| Walleye dermal sarcoma virus (WDSV)                     | NP_045937.1          |
| Feline leukemia virus (FLV)                             | NP_955577.1          |
| Moloney murine leukemia virus (MMLV)                    | NP_057933.2          |
| Baboon endogenous retrovirus (ERV-Baboon)               | BAA89659.1           |
| Baboon endogenous retrovirus (ERV-Baboon 2)             | AHZZ01047987         |
| Gibbon ape leukemia virus (GALV)                        | NP_056790.1          |
| RD114 retrovirus                                        | NC_009889            |
| <i>Rhinolophus ferrumequinum</i> retrovirus (RfRV)      | JQ303225             |
| <i>Tursiops truncatus</i> endogenous retrovirus (TTERV) | ABRN02237111         |
| Koala retrovirus (KoRV)                                 | AF151794.2           |

---

|                                                                      |          |
|----------------------------------------------------------------------|----------|
| Porcine endogenous retrovirus C (PERV-A)                             | EU789636 |
| Porcine endogenous retrovirus C (PERV-C)                             | HM159246 |
| <i>Xenopus tropicalis</i> endogenous retrovirus 2 (XTERV2)           | HM765512 |
| Zebrafish endogenous retrovirus (ZFERV)                              | AF503912 |
| Atlantic salmon swim bladder sarcoma virus (SSSV)                    | DQ174103 |
| Rabbit endogenous lentivirus type K (RELK)                           | Ref. 1   |
| Gray mouse lemur prosimian immunodeficiency virus (pSIVgml)          | Ref. 2   |
| Sloth endogenous foamy virus (SloEFV)                                | Ref. 3   |
| Mustelidae endogenous lentivirus (MELV)                              | Ref. 4   |
| HERV-S                                                               | Ref. 5   |
| HERV-L                                                               | Ref. 5   |
| HERV-FRD                                                             | Ref. 5   |
| HERV-Hconsensus                                                      | Ref. 5   |
| HERVH-RGH2                                                           | Ref. 5   |
| HERV-Fc1                                                             | Ref. 5   |
| HERV-W                                                               | Ref. 5   |
| HERV-E                                                               | Ref. 5   |
| ERV-3                                                                | Ref. 5   |
| HERV-T                                                               | Ref. 5   |
| Xen1                                                                 | Ref. 5   |
| HML1                                                                 | Ref. 5   |
| HML2                                                                 | Ref. 5   |
| HML3                                                                 | Ref. 5   |
| HML4                                                                 | Ref. 5   |
| HML5                                                                 | Ref. 5   |
| HML6                                                                 | Ref. 5   |
| HML7                                                                 | Ref. 5   |
| HML8                                                                 | Ref. 5   |
| HML9                                                                 | Ref. 5   |
| <i>Gallus gallus</i> endogenous retrovirus LA (GGERV-LA)             | Ref. 6   |
| <i>Gallus gallus</i> endogenous retrovirus 10 (GGERV-10)             | Ref. 6   |
| <i>Zonotrichia albicollis</i> endogenous retrovirus type A (ZAERV-A) | Ref. 6   |
| Coelacanth endogenous foamy virus (CoEFV)                            | Ref. 7   |
| Galeopterus variegatus endogenous lentivirus (GvaELV)                | Ref. 8   |

---

## References

1. Katzourakis A, Tristem M, Pybus OG, Gifford RJ (2007) Discovery and analysis of the first endogenous lentivirus. *Proc Natl Acad Sci USA* 104: 6261-6265.
2. Gifford RJ, Katzourakis A, Tristem M, Pybus OG, Winters M, Shafer RW. (2008) A transitional endogenous lentivirus from the genome of a basal primate and implications for lentivirus evolution. *Proc Natl Acad Sci USA* 105: 20362-20367.
3. Katzourakis A, Gifford RJ, Tristem M, Gilbert MT, Pybus OG (2009) Macroevolution of complex retroviruses. *Science* 325: 1512.
4. Han GZ, Worobey M. (2012). Endogenous lentiviral elements in the weasel family (Mustelidae). *Mol Biol Evol* (in press).
5. Jern P, Sperber GO, Blomberg J. (2005). Use of endogenous retroviral sequences (ERVs) and structural markers for retroviral phylogenetic inference and taxonomy. *Retrovirology* 2: 50.

6. <http://bioinformatics.cvr.ac.uk/paleovirology/site/html/retroviruses.html>
7. Han GZ, Worobey M. (2012). An endogenous foamy-like viral element in the coelacanth genome. *PLOS Pathog* 8: e1002790.
8. Han GZ, Worobey M. (2015). A primitive endogenous lentivirus in a colugo: insights into the early evolution of lentiviruses. *Mol Biol Evol* 32: 211-215.
